# Supplementary material for: Extreme sampling design in genetic association mapping of quantitative trait loci using balanced and unbalanced case-control samples
Source: PubMed Central journal article supplement (PMC6820758; doi:10.1038/s41598-019-51790-w), 2019-10-29
Supplement: 41598_2019_51790_MOESM1_ESM.pdf [file 41598_2019_51790_MOESM1_ESM.pdf]

# Extreme sampling design in genetic association mapping of quantitative trait loci using balanced and unbalanced case-control samples

Yi Li<sup>1</sup>, Orna Levran<sup>2</sup>, JongJoo Kim<sup>3</sup>, Tiejun Zhang<sup>4,5</sup>, Xingdong Chen<sup>6§</sup> & Chen Suo<sup>4,5§</sup>

<sup>1</sup>School of Statistics, Shanxi University of Finance & Economics, Shanxi, China

<sup>2</sup>Laboratory of the Biology of Addictive Diseases, Rockefeller University, New York, US

<sup>3</sup>Department of Biotechnology, Yeungnam University, Gyeongsan, Korea

<sup>4</sup>Department of Epidemiology, School of Public Health, Fudan University, Shanghai, China

<sup>5</sup>Key Laboratory of Public Health Safety (Fudan University), Ministry of Education, China

<sup>6</sup>State Key Laboratory of Genetic Engineering and Collaborative Innovation Center for Genetics and Development, School of Life Sciences, Fudan University, Shanghai, China

§Corresponding author

XC: xingdongchen@fudan.edu.cn

CS: suochen@fudan.edu.cn

## Supplementary figures

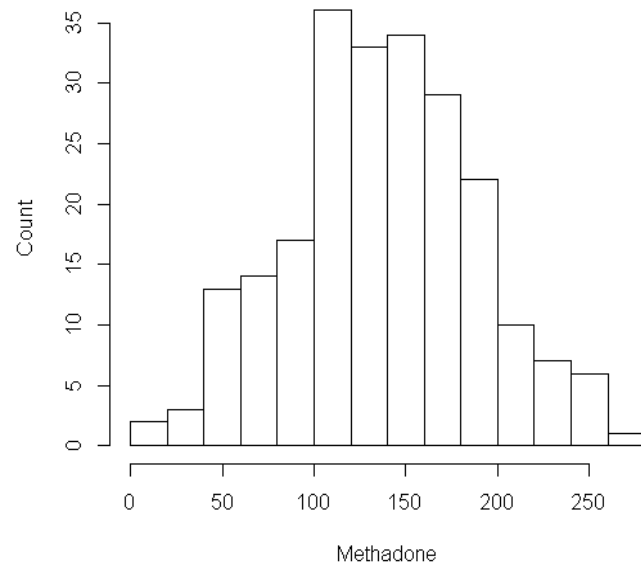

Figure S1 Histogram of methadone doses. The distribution of the methadone doses phenotype used in this study.

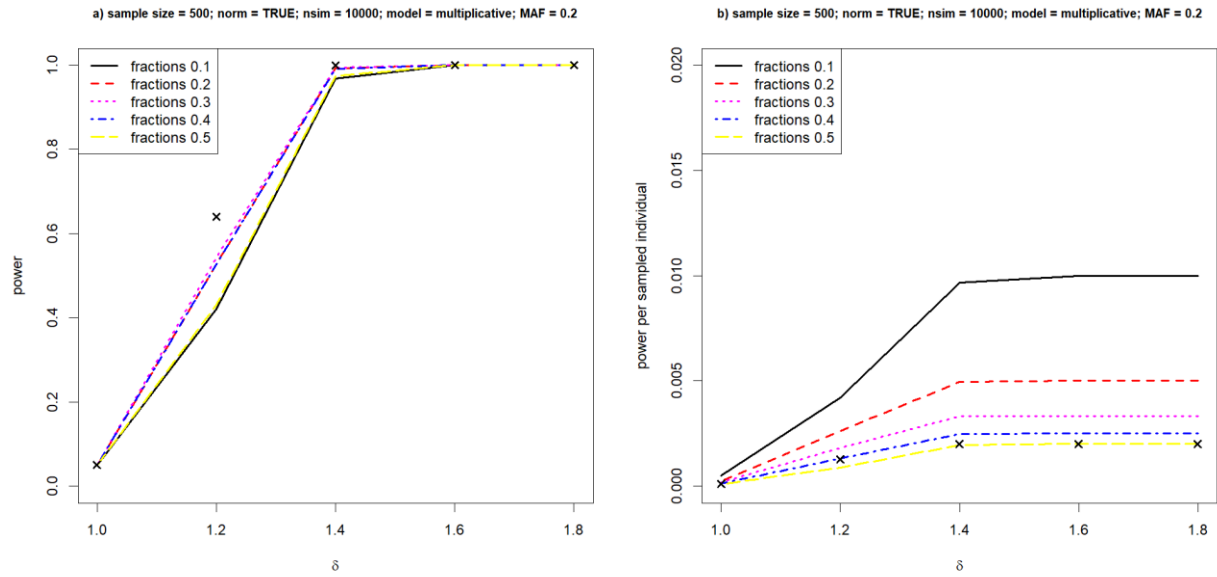

Figure S2 Relationship between power and various fractions in selecting cases and controls, under the multiplicative model.

a) sample size = 300; norm = TRUE; nsim = 10000; model = dominant; MAF = 0.3; fractions\_case = 0.1

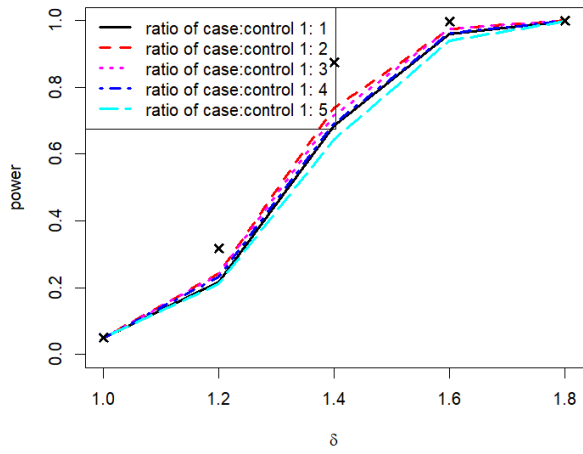

b) sample size = 300; norm = TRUE; nsim = 10000; model = dominant; MAF = 0.3; fractions\_case = 0.2

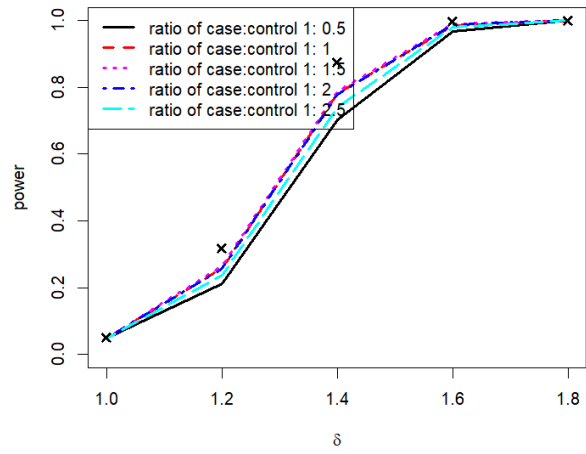

c) sample size = 300; norm = TRUE; nsim = 10000; model = dominant; MAF = 0.3; fractions\_case = 0.4

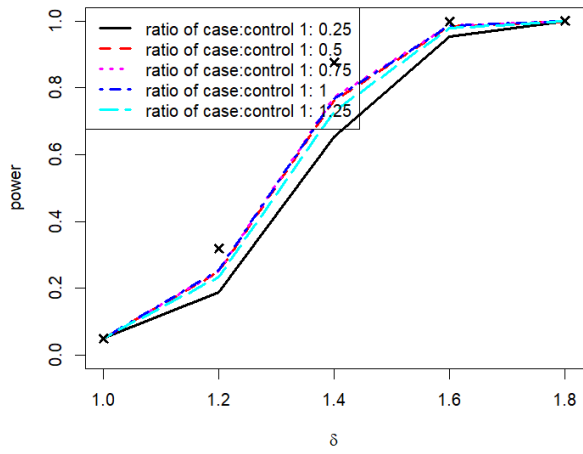

d) sample size = 300; norm = TRUE; nsim = 10000; model = dominant; MAF = 0.3; fractions\_case = 0.5

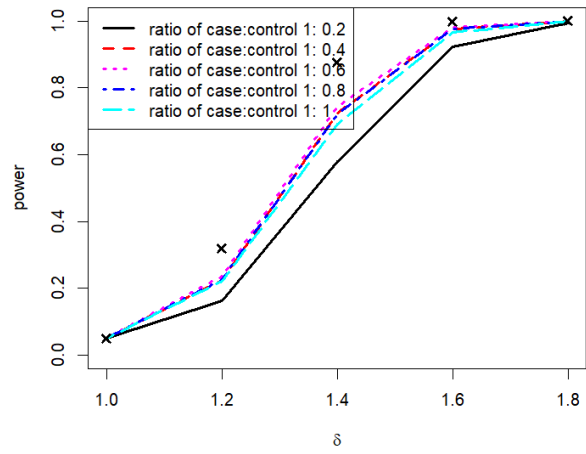

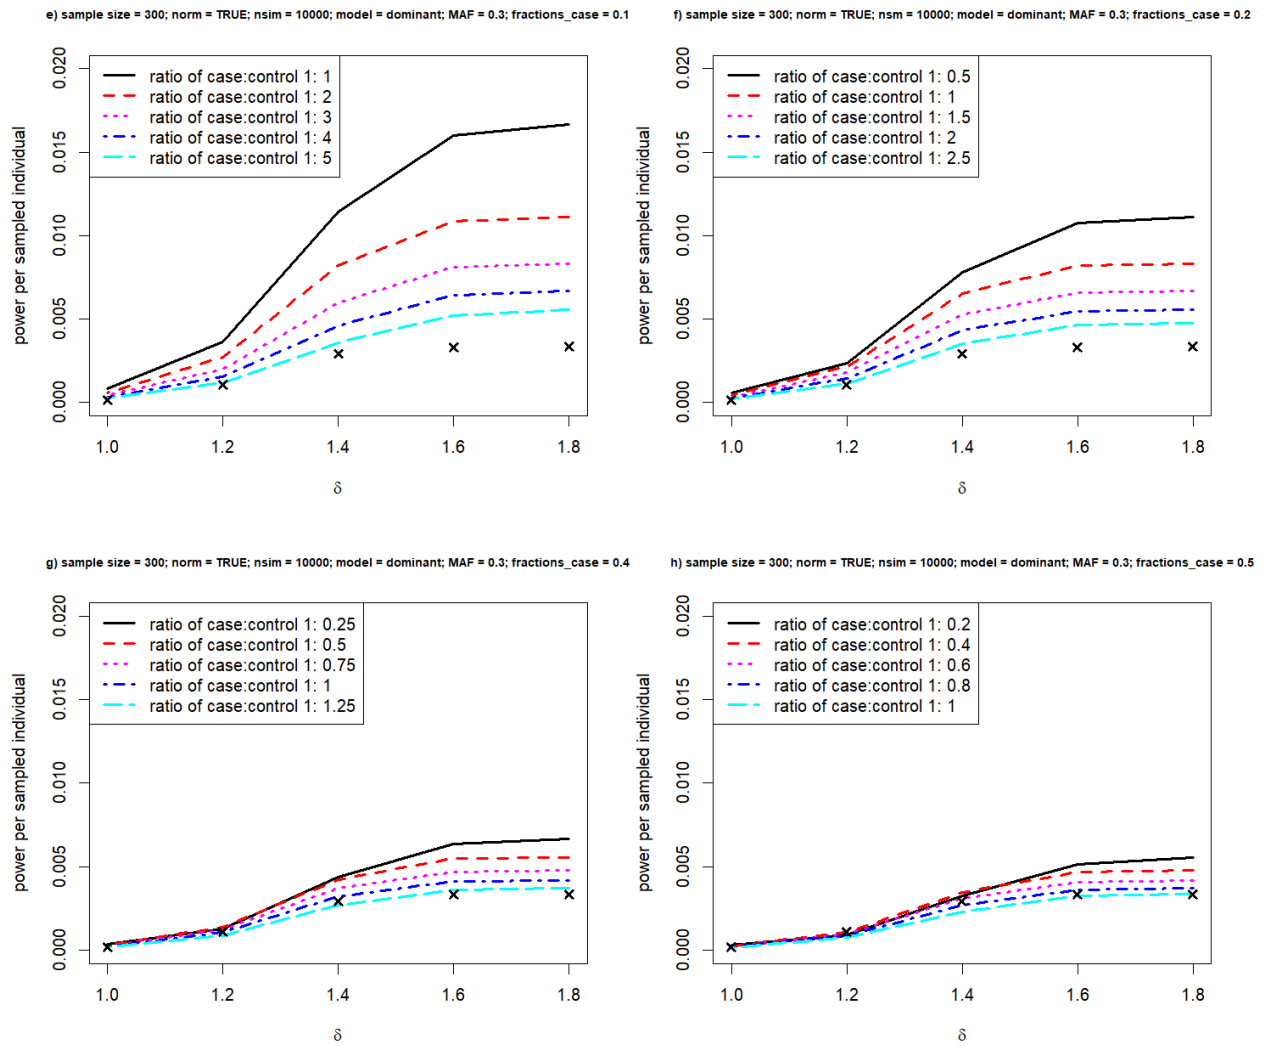

Figure S3 Relationship between power and various unequal fractions in selecting cases and controls, under the dominant model. The parameter settings are self-explanatory in the titles.

a) sample size = 500; norm = TRUE; nsim = 10000; model = recessive; MAF = 0.2; fractions\_case = 0.2

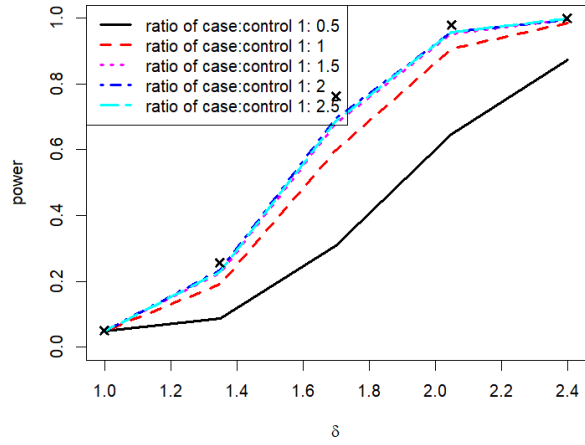

b) sample size = 500; norm = TRUE; nsim = 10000; model = recessive; MAF = 0.2; fractions\_case = 0.3

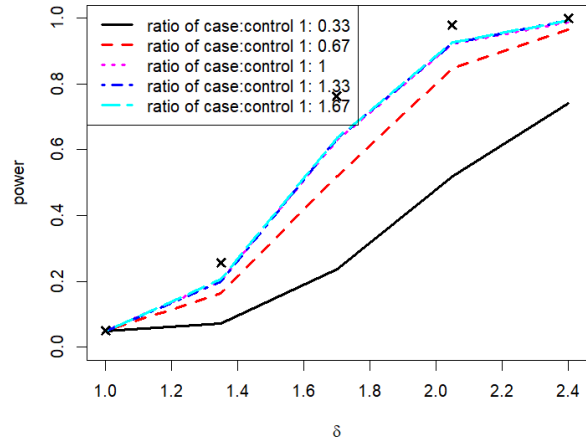

c) sample size = 500; norm = TRUE; nsim = 10000; model = recessive; MAF = 0.2; fractions\_case = 0.4

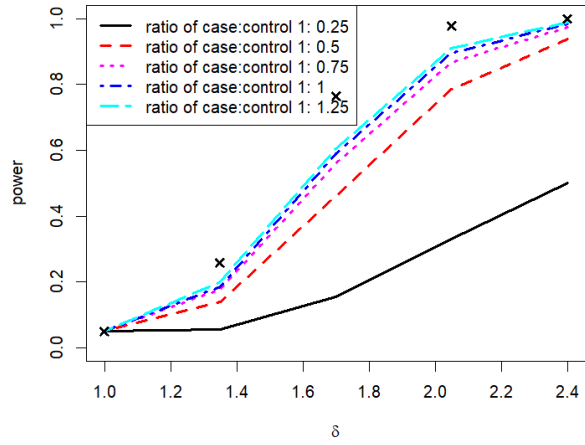

d) sample size = 500; norm = TRUE; nsim = 10000; model = recessive; MAF = 0.2; fractions\_case = 0.5

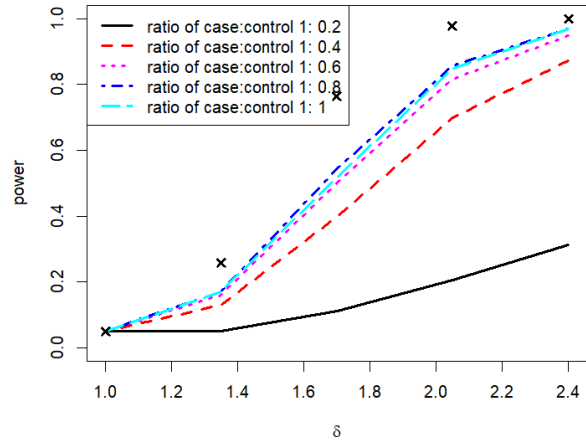

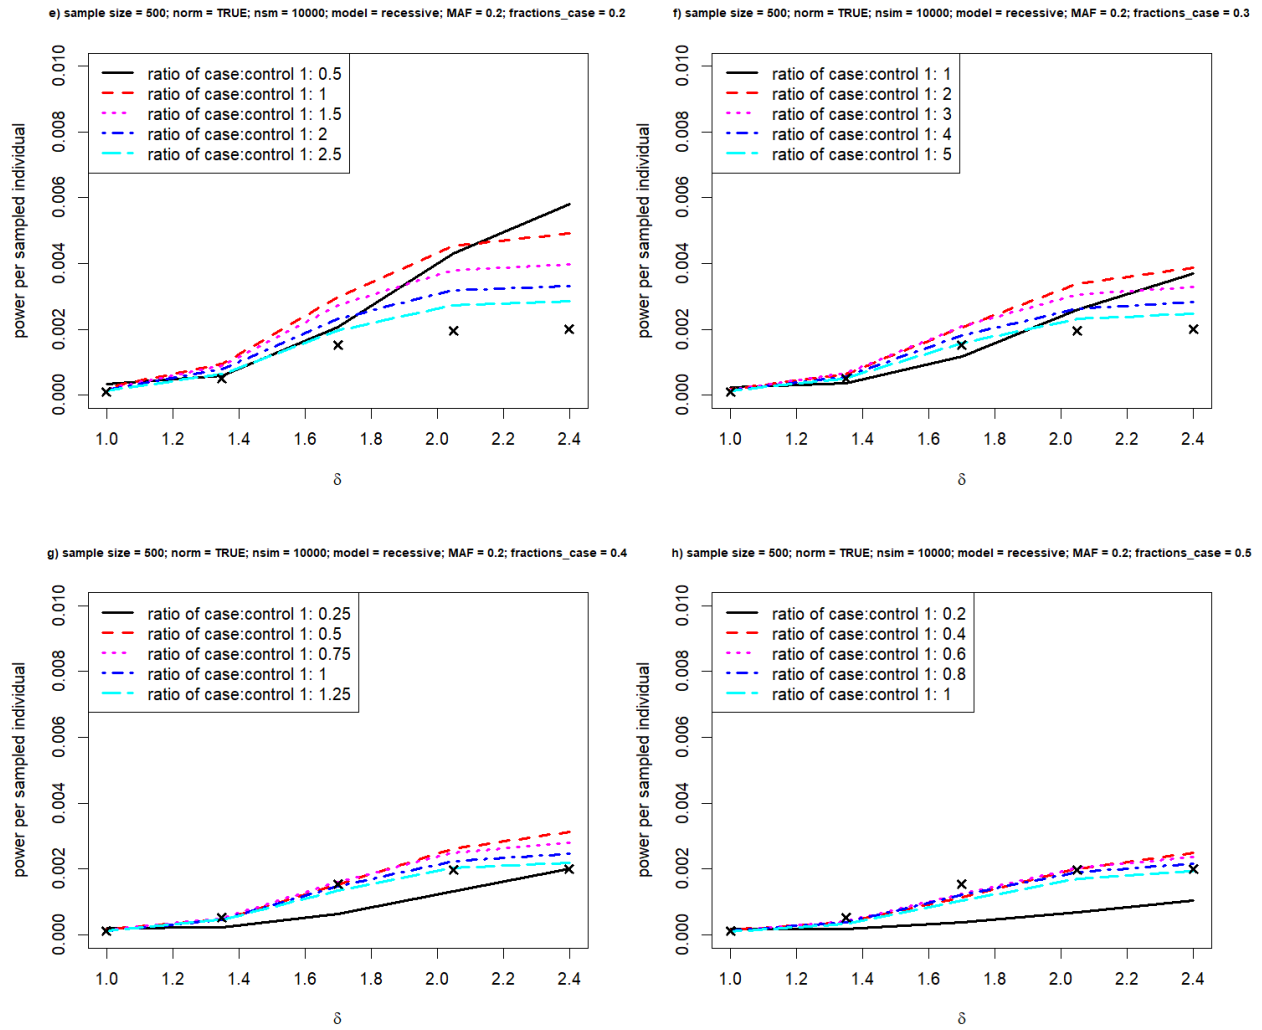

Figure S4 Relationship between power and various unequal fractions in selecting cases and controls, under the recessive model. The parameter settings are self-explanatory in the title.

## Supplementary code

# An R function to simulate a quantitative phenotype y and a snp x associated with y

# Written by: Chen Suo

#####The following is a description of parameters in the function simuXY#####

#####

#number of simulations: nsim

#subjects = n, snps = m

#means in different genotype groups  $\mu <- c(1*\delta^2, 1*\delta, 1)$

#proportion in tails of phenotype distribution,  $p=0.25$

#allele freq q1. E.g q1 = 0.3, so gene freq is about 0.49(00), 0.42(01) and 0.09(11)

#use p-value, or test statistics pval=FALSE

#a seed can be used to restore the random number generation in R: #set.seed(1611)

##vary proportions

```
simuXY <- function(nsim=100, n=300, n2=100, m=1, delta=1.2, mu=c(1*delta^2, 1*delta, 1), q1=0.3,
SD=1, p=seq(0.1, 0.5, length.out=10), pval=T, norm=T, seed=set.seed(1611), model=c("dominant",
"multiplicative", "recessive"),random_sampling=TRUE){
```

```
  ind.name <- sapply(c(1:n), function(x){paste("sample", x, sep="" )})
```

```
  snp.name <- sapply(c(1:m), function(x){paste("snp", x, sep="" )})
```

```
  sim.name <- sapply(c(1:nsim), function(x){paste("sim", x, sep="" )})
```

```
  nf <- length(p)
```

```
  f.name <- sapply(c(1:nf), function(x){paste("f", round(x, 2), sep="" )})
```



```

stats <- list()

tmax <- matrix(NA, ncol=nsim, nrow=length(p))

seed

stats[['pval']] <- stats[['Perm']] <- matrix(NA, ncol=nf, nrow=nsim, dimnames = list(sim.name, f.name))

for(sim in 1:nsim){

  for(pr in p){

    j <- which(p%in%pr)

    #for(pr2 in p){

    #j <- which(p%in%pr)

    #simulate X

    a1 <- sapply(c(1:m), function(x){rbinom(1, n=n, prob=q1)})

    a2 <- sapply(c(1:m), function(x){rbinom(1, n=n, prob=q1)})

    x <- a1+a2

    colnames(x) <- snp.name

    x <- x[order(x[, "snp1"]),]

    #we need to order such that the phenotype and genotype is corresponding

    if(is.vector(x))

      dim(x) <- list(n, 1)

    rownames(x) <- ind.name

    colnames(x) <- snp.name
  }
}

```

```

#simulate Y
ni <- table(x[, "snp1"])
if(norm){
  if(model=='multiplicative'){
    y11 <- rnorm(n=ni[1], mean=mu[3], sd=SD)
    y12 <- rnorm(n=ni[2], mean=mu[2], sd=SD)
    y22 <- rnorm(n=ni[3], mean=mu[1], sd=SD)
  }
  if(model=='dominant'){
    y11 <- rnorm(n=ni[1], mean=mu[3], sd=SD)
    y12 <- rnorm(n=ni[2], mean=mu[2], sd=SD)
    y22 <- rnorm(n=ni[3], mean=mu[2], sd=SD)
  }
  if(model=='recessive'){
    y11 <- rnorm(n=ni[1], mean=mu[3], sd=SD)
    y12 <- rnorm(n=ni[2], mean=mu[3], sd=SD)
    y22 <- rnorm(n=ni[3], mean=mu[2], sd=SD)
  }
} else {
  if(model=='multiplicative'){
    #this would be the same as norm=T, as it is only a monotone transformation.
    #Ordering of phenotype values does not change.
    y11 <- rnorm(n=ni[1], mean=exp(mu[3]), sd=SD)
    y12 <- exp(rnorm(n=ni[2], mean=mu[2], sd=SD))
    y22 <- exp(rnorm(n=ni[3], mean=mu[1], sd=SD))
  }
}

```

```

}

if(model=='dominant'){
  y11 <- rnorm(n=ni[1], mean=exp(mu[3]), sd=SD)
  y12 <- exp(rnorm(n=ni[2], mean=mu[2], sd=SD))
  y22 <- exp(rnorm(n=ni[3], mean=mu[2], sd=SD))
}

if(model=='recessive'){
  y11 <- rnorm(n=ni[1], mean=exp(mu[3]), sd=SD)
  y12 <- rnorm(n=ni[2], mean=exp(mu[3]), sd=SD)
  y22 <- exp(rnorm(n=ni[3], mean=mu[2], sd=SD))
}
}

y <- c(y11, y12, y22)
names(y) <- ind.name

if(random_sampling == TRUE){
  #####Random sampling#####
  sub_n <- 2*pr*n
  ind.name.sample <- sample(ind.name,sub_n)
  y.sub1 <-y[ind.name.sample]
  x.sub1 <-x[ind.name.sample,]
  stats1 <- getm(y.sub1,x.sub1, p=1)
}else{
  if(p==1){

```

```

        #qtl?
        stats1 <- getm(y, x, pval=pval, qtl, model=model, p=p)

    } else {
        qtl <- quantile(y, c(pr, 1-pr))
        y.sub <- y[y<=qtl[1] | y>=qtl[2]]
        x.sub <- x[y<=qtl[1] | y>=qtl[2], ]

        #Given y and x
        stats1 <- getm(y.sub, x.sub, pval=pval, qtl, model=model, p=p)
    }
}

if(pval)
  stats[['pval']][sim,f.name[j]] <- stats1 else
  stats[['pval']][sim,f.name[j]] <- stats1

#stats[['pval']][[paste(f.name[j])]][sim,f.name[j]] <- stats1 else
#stats[['pval']][[paste(f.name[j])]][sim,f.name[j]] <- stats1

##4) permutation

##Permute the lables of samples
# index <- sample(x=rownames(x.sub), size=nrow(x.sub), replace=FALSE)
# per.y <- y.sub[index]

```

```

##get the distribution of tmax under null

# stats2 <- NULL

# stats2 <- sapply("snp1", function(i){getm(y=per.y, x.sub, i, pval=pval)})

#if(pval)

# tmax[j,sim] <- stats2 else

#tmax[j,sim] <- stats2

#}

}

}

#get the test statistic/pval for 2)

#for(pr in p){

# j <- which(pr%in%p)

#stats[['Perm']][ ,f.name[pr]] <- sapply(stats[['Bonf']][,"snp1"], function(x){ifelse(pval,
sum(tmax[j,]<=x), sum(tmax[j,]>=x))})

#}

stats

}

#small functions

#function to run anova for a particular phenotype p with snp i. Output could be either p-value or F-stats

getm <- function(y, x, pval=TRUE, qtl, model=model, p){

if(p==1){

```

```

mod <- aov(y ~ as.factor(x))

if(pval)

  stats <- summary(mod)[[1]]$P[1] else

  stats <- summary(mod)[[1]]$F[1]

} else {

tab <- matrix(0, nrow=2, ncol=3, dimnames=list(c("cases", "controls"), c("0", "1", "2")))

tab1 <- table(x[y>=qtl[2]])

tab2 <- table(x[y<=qtl[1]])

tab[1,names(tab1)] <- tab1

tab[2,names(tab2)] <- tab2

if(pval)

  stats <- fisher.test(tab)$p

}

Stats }

```

```

# Runfile: Power analysis of different ways extreme case-control design.

# Written by: Chen Suo

rm(list=ls())

library(MASS) #this package allows us to use function mvnrm and has already been installed as default
in R

#To instal 'Rlab'. Run the following two lines:

#source("http://www.bioconductor.org/biocLite.R")

#biocLite("Rlab")

#library(Rlab) # generates Bernoulli random deviates

setwd("E:\\Suoichen\\scientific reports\\rebuttall\\source_code") #Please change to your own directory

source('batch_extreQTL_simu.r')

#AA, Aa, aa

wd <- getwd()

nsim <- 10000

m <- 1

pval <- TRUE

norm <- TRUE

cali <- TRUE

n <- 300

p <- seq(0.1, 0.5, length.out=5)

nf <- length(p)

f.name <- sapply(c(1:nf), function(x){paste("f", round(x, 2), sep="" )})

```

```

cols <- c(1, 2, 6, 4, 7)

q1 <- 0.3

#deltas <- c(1.4, 1.3, 1.2, 1)

deltas <- seq(1, 1.4, length.out=5)

pw <- matrix(NA, ncol=length(p), nrow=length(deltas), dimnames=list(deltas, f.name))

model <- 'multiplicative'

delta <- 1

stats.null <- simuXY(nsim=nsim, n=n, m=m, delta=delta, mu=c(1*delta^2, 1*delta, 1), p=p, q1=q1, SD=1,
pval=pval, norm=norm, seed=set.seed(2811), model=model,random_sampling=FALSE)

cutoff <- matrix(NA, ncol=1, nrow=length(p), dimnames=list(f.name, paste(delta)))

for(pr in p){
  j <- which(p%in%pr)
  for(i in 1:1){
    if(pval){
      if(cali)
        cutoff[j, i] <- quantile(stats.null[['pval']][,j], probs=0.05) else
        cutoff[j, i] <- 0.05
    } else {
      if(cali)
        cutoff[j, i] <- quantile(stats.null[['pval']][,j], probs=0.95) else
        cutoff[j, i] <- 0.05
    }
  }
}

```



```

    }
}

stats <- NULL

for(delta in deltas){

stats[[paste(delta)]] <- simuXY(nsim=nsim, n=n, m=m, delta=delta, p=p, mu=c(1*delta^2, 1*delta, 1),
q1=q1, SD=1, pval=pval, norm=norm, seed=set.seed(2811), model=model, random_sampling=FALSE)

for(pr in p){

  j <- which(p%in%pr)

  if(pval)

    #pw[paste(delta),j] <- sum(stats[[paste(delta)]][['pval']][,j] <= 0.05)/nsim else

    pw[paste(delta),j] <- sum(stats[[paste(delta)]][['pval']][,j] <= cutoff[j, 1])/nsim else

    pw[paste(delta),j] <- sum(stats[[paste(delta)]][['pval']] >= cutoff[j,i])/nsim

}

}

#quantitative

delta <- 1

stats.null.q <- simuXY(nsim=nsim, n=n, m=m, delta=delta, mu=c(1*delta^2, 1*delta, 1), p=1, q1=q1,
SD=1, pval=pval, norm=norm, seed=set.seed(2811), model=model)

stats.q <- NULL

for(delta in deltas){

  stats.q[[paste(delta)]] <- simuXY(nsim=nsim, n=n, m=m, delta=delta, p=1, mu=c(1*delta^2, 1*delta, 1),
q1=q1, SD=1, pval=pval, norm=norm, seed=set.seed(2811), model=model, random_sampling=FALSE)

}

```

```

cutoff.q <- quantile(stats.null.q[['pval']][,1], probs=0.05)

pw.q <- sapply(c(1:length(deltas)), function(j) sum(stats.q[[j]][['pval']][,1] <= cutoff.q)/nsim)

#plot figure 1: power vs p

plot(p, pw[1,], xlab="Fractions", ylim=c(0,1), ylab="power", type="l", lty=1, col=cols[1], lwd=2,
main=paste("sample size = ", n, "; norm = ", norm, "; nsim = ", nsim, "; model = ", model, sep=""),
cex.main=0.8)

lines(p, pw[2,], lty=2, col=cols[2], lwd=2)

lines(p, pw[3,], lty=3, col=cols[3], lwd=2)

lines(p, pw[4,], lty=4, col=cols[4], lwd=2)

legend("bottomright", sapply(deltas, function(x) paste(expression(delta), x)), lty=c(1:4), col=cols, lwd=2)

abline(h=0.05, col='gray')

#power vs deltas

frac <- round(p,1)

frac <- round(c(p[1], p[2], p[3], p[4], p[5]),1)

plot(deltas[length(deltas):1], pw[nrow(pw):1,1], xlab=expression(delta), ylim=c(0,1), ylab="power",
type="l", lty=1, col=cols[1], lwd=2, main=paste("sample size = ", n, "; norm = ", norm, "; nsim = ", nsim, ";
model = ", model, "; MAF = ", q1, sep=""), cex.main=0.8)

lines(deltas[length(deltas):1], pw[nrow(pw):1,2], lty=2, col=cols[2], lwd=2)

lines(deltas[length(deltas):1], pw[nrow(pw):1,3], lty=3, col=cols[3], lwd=2)

lines(deltas[length(deltas):1], pw[nrow(pw):1,4], lty=4, col=cols[4], lwd=2)

lines(deltas[length(deltas):1], pw[nrow(pw):1,5], lty=5, col=cols[5], lwd=2)

legend("bottomright", sapply(frac, function(x) paste("fractions", x)), lty=c(1:5), col=cols, lwd=2)

points(deltas, pw.q, pch=4, lwd=2)

#Aa+aa

```

```

wd <- getwd()

nsim <- 10000

m <- 1

pval <- TRUE

norm <- TRUE

cali <- TRUE

n <- 300

p <- seq(0.1, 0.5, length.out=5)

nf <- length(p)

f.name <- sapply(c(1:nf), function(x){paste("f", round(x, 2), sep="" )})

cols <- c(1, 2, 6, 4, 7)

q1 <- 0.3

#deltas <- c(1.4, 1.3, 1.2, 1)

deltas <- seq(1, 1.4, length.out=5)

pw <- matrix(NA, ncol=length(p), nrow=length(deltas), dimnames=list(deltas, f.name))

model <- 'dominant'

delta <- 1

stats.null <- simuXY(nsim=nsim, n=n, m=m, p=p,delta=delta, mu=c(1*delta^2, 1*delta, 1), q1=q1, SD=1,
pval=pval, norm=norm, seed=set.seed(2811), model=model, random_sampling=FALSE)

cutoff <- matrix(NA, ncol=1, nrow=length(p), dimnames=list(f.name, paste(delta)))

for(pr in p){
  j <- which(p%in%pr)

```

```

for(i in 1:1){
  if(pval){
    if(cali)
      cutoff[j, i] <- quantile(stats.null[['pval']][,j], probs=0.05) else
      cutoff[j, i] <- 0.05
  } else {
    if(cali)
      cutoff[j, i] <- quantile(stats.null[['pval']][,j], probs=0.95) else
      cutoff[j, i] <- 0.05
  }
}
}

```

```
stats <- NULL
```

```
for(delta in deltas){
```

```
stats[[paste(delta)]] <- simuXY(nsim=nsim, n=n, m=m, p=p,delta=delta, mu=c(1*delta^2, 1*delta, 1),
q1=q1, SD=1, pval=pval, norm=norm, seed=set.seed(2811), model=model, random_sampling=FALSE)
```

```
for(pr in p){
```

```
  j <- which(p%in%pr)
```

```
  if(pval)
```

```
    #pw[paste(delta),j] <- sum(stats[[paste(delta)]][['pval']][,j] <= 0.05)/nsim else
```

```
    pw[paste(delta),j] <- sum(stats[[paste(delta)]][['pval']][,j] <= cutoff[j, 1])/nsim else
```

```
    pw[paste(delta),j] <- sum(stats[[paste(delta)]][['pval']] >= cutoff[j,i])/nsim
```

```
}
```

```

}

#quantitative

delta <- 1

stats.null.q <- simuXY(nsim=nsim, n=n, m=m, delta=delta, mu=c(1*delta^2, 1*delta, 1), p=1, q1=q1,
SD=1, pval=pval, norm=norm, seed=set.seed(2811), model=model, random_sampling=FALSE)

stats.q <- NULL

for(delta in deltas){

  stats.q[[paste(delta)]] <- simuXY(nsim=nsim, n=n, m=m, delta=delta, p=1, mu=c(1*delta^2, 1*delta, 1),
q1=q1, SD=1, pval=pval, norm=norm, seed=set.seed(2811), model=model, random_sampling=FALSE)

}

cutoff.q <- quantile(stats.null.q[['pval']][,1], probs=0.05)

pw.q <- sapply(c(1:length(deltas)), function(j) sum(stats.q[[j]][['pval']][,1] <= cutoff.q)/nsim)

#plot figure 1: power vs p

plot(p, pw[1,], xlab="Fractions", ylim=c(0,1), ylab="power", type="l", lty=1, col=cols[1], lwd=2,
main=paste("sample size = ", n, "; norm = ", norm, "; nsim = ", nsim, "; model = ", model, sep=""),
cex.main=0.8)

lines(p, pw[2,], lty=2, col=cols[2], lwd=2)

lines(p, pw[3,], lty=3, col=cols[3], lwd=2)

lines(p, pw[4,], lty=4, col=cols[4], lwd=2)

legend("bottomright", sapply(deltas, function(x) paste(expression(delta), x)), lty=c(1:4), col=cols, lwd=2)

abline(h=0.05, col='gray')

#power vs deltas

frac <- round(p,1)

#frac <- round(c(p[1], p[3], p[5], p[8], p[10]),1)

```

```

plot(deltas[length(deltas):1], pw[nrow(pw):1,1], xlab=expression(delta), ylim=c(0,1), ylab="power",
type="l", lty=1, col=cols[1], lwd=2, main=paste("sample size = ", n, "; norm = ", norm, "; nsim = ", nsim, ";
model = ", model, "; MAF = ", q1, sep=""), cex.main=0.8)

lines(deltas[length(deltas):1], pw[nrow(pw):1,2], lty=2, col=cols[2], lwd=2)

lines(deltas[length(deltas):1], pw[nrow(pw):1,3], lty=3, col=cols[3], lwd=2)

lines(deltas[length(deltas):1], pw[nrow(pw):1,4], lty=4, col=cols[4], lwd=2)

lines(deltas[length(deltas):1], pw[nrow(pw):1,5], lty=5, col=cols[5], lwd=2)

legend("bottomright", sapply(frac, function(x) paste("fractions", x)), lty=c(1:5), col=cols, lwd=2)

points(deltas, pw.q, pch=4, lwd=2)

```

```
#aa. a is the minor allele
```

```
wd <- getwd()
```

```
nsim <- 10000
```

```
m <- 1
```

```
pval <- TRUE
```

```
norm <- TRUE
```

```
cali <- TRUE
```

```
n <- 300
```

```
p <- seq(0.1, 0.5, length.out=5)
```

```
nf <- length(p)
```

```
f.name <- sapply(c(1:nf), function(x){paste("f", round(x, 2), sep="")})
```

```
cols <- c(1, 2, 6, 4, 7)
```

```
q1 <- 0.3
```

```
#deltas <- c(1.7, 1.5, 1.3, 1)
```

```
deltas <- seq(1, 1.7, length.out=5)
```

```

pw <- matrix(NA, ncol=length(p), nrow=length(deltas), dimnames=list(deltas, f.name))

model <- 'recessive'

delta <- 1

stats.null <- simuXY(nsim=nsim, n=n, m=m, delta=delta, mu=c(1*delta^2, 1*delta, 1), p=p, q1=q1, SD=1,
pval=pval, norm=norm, seed=set.seed(2811), model=model, random_sampling=FALSE)

cutoff <- matrix(NA, ncol=1, nrow=length(p), dimnames=list(f.name, paste(delta)))

for(pr in p){
  j <- which(p%in%pr)
  for(i in 1:1){
    if(pval){
      if(cali)
        cutoff[j, i] <- quantile(stats.null[['pval']][,j], probs=0.05) else
        cutoff[j, i] <- 0.05
    } else {
      if(cali)
        cutoff[j, i] <- quantile(stats.null[['pval']][,j], probs=0.95) else
        cutoff[j, i] <- 0.05
    }
  }
}

stats <- NULL

for(delta in deltas){

```

```
stats[[paste(delta)]] <- simuXY(nsim=nsim, p=p,n=n, m=m, delta=delta, mu=c(1*delta^2, 1*delta, 1),
q1=q1, SD=1, pval=pval, norm=norm, seed=set.seed(2811), model=model, random_sampling=FALSE)
```

```
for(pr in p){
```

```
  j <- which(p%in%pr)
```

```
  if(pval)
```

```
    #pw[paste(delta),j] <- sum(stats[[paste(delta)]][['pval']][,j] <= 0.05)/nsim else
```

```
    pw[paste(delta),j] <- sum(stats[[paste(delta)]][['pval']][,j] <= cutoff[j, 1])/nsim else
```

```
    pw[paste(delta),j] <- sum(stats[[paste(delta)]][['pval']] >= cutoff[j,i])/nsim
```

```
}
```

```
}
```

```
#quantitative
```

```
delta <- 1
```

```
stats.null.q <- simuXY(nsim=nsim, n=n, m=m, delta=delta, mu=c(1*delta^2, 1*delta, 1), p=1, q1=q1,
SD=1, pval=pval, norm=norm, seed=set.seed(2811), model=model, random_sampling=FALSE)
```

```
stats.q <- NULL
```

```
for(delta in deltas){
```

```
  stats.q[[paste(delta)]] <- simuXY(nsim=nsim, n=n, m=m, delta=delta, p=1, mu=c(1*delta^2, 1*delta, 1),
q1=q1, SD=1, pval=pval, norm=norm, seed=set.seed(2811), model=model, random_sampling=FALSE)
```

```
}
```

```
cutoff.q <- quantile(stats.null.q[['pval']][,1], probs=0.05)
```

```
pw.q <- sapply(c(1:length(deltas)), function(j) sum(stats.q[[j]][['pval']][,1] <= cutoff.q)/nsim)
```

```
#plot figure 1: power vs p
```



```

plot(p, pw[1,], xlab="Fractions", ylim=c(0,1), ylab="power", type="l", lty=1, col=cols[1], lwd=2,
main=paste("sample size = ", n, "; norm = ", norm, "; nsim = ", nsim, "; model = ", model, sep=""),
cex.main=0.8)

lines(p, pw[2,], lty=2, col=cols[2], lwd=2)

lines(p, pw[3,], lty=3, col=cols[3], lwd=2)

lines(p, pw[4,], lty=4, col=cols[4], lwd=2)

legend("bottomright", sapply(deltas, function(x) paste(expression(delta), x)), lty=c(1:4), col=cols, lwd=2)

abline(h=0.05, col='gray')

```

```
#power vs deltas
```

```
frac <- round(p,1)
```

```
#frac <- round(c(p[1], p[3], p[5], p[8], p[10]),1)
```

```

plot(deltas[length(deltas):1], pw[nrow(pw):1,1], xlab=expression(delta), ylim=c(0,1), ylab="power",
type="l", lty=1, col=cols[1], lwd=2, main=paste("sample size = ", n, "; norm = ", norm, "; nsim = ", nsim, ";
model = ", model, "; MAF = ", q1, sep=""), cex.main=0.8)

```

```
lines(deltas[length(deltas):1], pw[nrow(pw):1,2], lty=2, col=cols[2], lwd=2)
```

```
lines(deltas[length(deltas):1], pw[nrow(pw):1,3], lty=3, col=cols[3], lwd=2)
```

```
lines(deltas[length(deltas):1], pw[nrow(pw):1,4], lty=4, col=cols[4], lwd=2)
```

```
lines(deltas[length(deltas):1], pw[nrow(pw):1,5], lty=5, col=cols[5], lwd=2)
```

```
legend("bottomright", sapply(frac, function(x) paste("fractions", x)), lty=c(1:5), col=cols, lwd=2)
```

```
points(deltas, pw.q, pch=4, lwd=2)
```

```
source('batch_extreQTL_simu.r')
```

```
#decrease MAF s.t pheno distribution becomes skewed
```

```
#AA, Aa, aa
```

```
wd <- getwd()
```

```

nsim <- 10000

m <- 1

pval <- TRUE

norm <- TRUE

cali <- TRUE

n <- 500

p <- seq(0.1, 0.5, length.out=5)

q1 <- 0.2

nf <- length(p)

f.name <- sapply(c(1:nf), function(x){paste("f", round(x, 2), sep="" )})

cols <- c(1, 2, 6, 4, 7)

#deltas <- c(1.4, 1.3, 1.2, 1)

deltas <- seq(1, 1.4, length.out=5)

pw <- matrix(NA, ncol=length(p), nrow=length(deltas), dimnames=list(deltas, f.name))

model <- 'multiplicative'

delta <- 1

stats.null <- simuXY(nsim=nsim, n=n, m=m, delta=delta, mu=c(1*delta^2, 1*delta, 1), p=p, q1=q1, SD=1,
pval=pval, norm=norm, seed=set.seed(2811), model=model, random_sampling=FALSE)

cutoff <- matrix(NA, ncol=1, nrow=length(p), dimnames=list(f.name, paste(delta)))

for(pr in p){
  j <- which(p%in%pr)
  for(i in 1:1){

```

```

if(pval){
  if(cali)
    cutoff[j, i] <- quantile(stats.null[['pval']][,j], probs=0.05) else
    cutoff[j, i] <- 0.05
} else {
  if(cali)
    cutoff[j, i] <- quantile(stats.null[['pval']][,j], probs=0.95) else
    cutoff[j, i] <- 0.05
}
}
}

```

```
stats <- NULL
```

```
for(delta in deltas){
```

```
stats[[paste(delta)]] <- simuXY(nsim=nsim, n=n, m=m, delta=delta,p=p, mu=c(1*delta^2, 1*delta, 1),
q1=q1, SD=1, pval=pval, norm=norm, seed=set.seed(2811), model=model, random_sampling=FALSE)
```

```
for(pr in p){
```

```
  j <- which(p%in%pr)
```

```
  if(pval)
```

```
    #pw[paste(delta),j] <- sum(stats[[paste(delta)]][['pval']][,j] <= 0.05)/nsim else
```

```
    pw[paste(delta),j] <- sum(stats[[paste(delta)]][['pval']][,j] <= cutoff[j, 1])/nsim else
```

```
    pw[paste(delta),j] <- sum(stats[[paste(delta)]][['pval']] >= cutoff[j,i])/nsim
```

```
}
```

```
}
```

```

#quantitative

delta <- 1

stats.null.q <- simuXY(nsim=nsim, n=n, m=m, delta=delta, mu=c(1*delta^2, 1*delta, 1), p=1, q1=q1,
SD=1, pval=pval, norm=norm, seed=set.seed(2811), model=model, random_sampling=FALSE)

stats.q <- NULL

for(delta in deltas){

  stats.q[[paste(delta)]] <- simuXY(nsim=nsim, n=n, m=m, delta=delta, p=1, mu=c(1*delta^2, 1*delta, 1),
q1=q1, SD=1, pval=pval, norm=norm, seed=set.seed(2811), model=model, random_sampling=FALSE)

}

cutoff.q <- quantile(stats.null.q[['pval']][,1], probs=0.05)

pw.q <- sapply(c(1:length(deltas)), function(j) sum(stats.q[[j]][['pval']][,1] <= cutoff.q)/nsim)

#plot figure 1: power vs r

plot(p, pw[1,], xlab="Fractions", ylim=c(0,1), ylab="power", type="l", lty=1, col=cols[1], lwd=2,
main=paste("sample size = ", n, "; ", "; norm = ", norm, "; nsim = ", nsim, "; model = ", model, sep=""),
cex.main=0.8)

lines(p, pw[2,], lty=2, col=cols[2], lwd=2)

lines(p, pw[3,], lty=3, col=cols[3], lwd=2)

lines(p, pw[4,], lty=4, col=cols[4], lwd=2)

legend("bottomright", sapply(deltas, function(x) paste(expression(delta), x)), lty=c(1:4), col=cols, lwd=2)

abline(h=0.05, col='gray')

#power vs deltas

frac <- round(p,1)

#frac <- round(c(p[1], p[3], p[5], p[8], p[10]),1)

```

```

plot(deltas[length(deltas):1], pw[nrow(pw):1,1], xlab=expression(delta), ylim=c(0,1), ylab="power",
type="l", lty=1, col=cols[1], lwd=2, main=paste("sample size = ", n, "; norm = ", norm, "; nsim = ", nsim, ";
model = ", model, "; MAF = ", q1, sep=""), cex.main=0.8)

lines(deltas[length(deltas):1], pw[nrow(pw):1,2], lty=2, col=cols[2], lwd=2)

lines(deltas[length(deltas):1], pw[nrow(pw):1,3], lty=3, col=cols[3], lwd=2)

lines(deltas[length(deltas):1], pw[nrow(pw):1,4], lty=4, col=cols[4], lwd=2)

lines(deltas[length(deltas):1], pw[nrow(pw):1,5], lty=5, col=cols[5], lwd=2)

legend("bottomright", sapply(frac, function(x) paste("fractions", x)), lty=c(1:5), col=cols, lwd=2)

points(deltas, pw.q, pch=4, lwd=2)

```

```
#Aa+aa. a is the minor allele
```

```
source('batch_extreQTL_simu.r')
```

```
wd <- getwd()
```

```
nsim <- 10000
```

```
m <- 1
```

```
pval <- TRUE
```

```
norm <- TRUE
```

```
cali <- TRUE
```

```
n <- 500
```

```
p <- seq(0.1, 0.5, length.out=5)
```

```
nf <- length(p)
```

```
f.name <- sapply(c(1:nf), function(x){paste("f", round(x, 2), sep="")})
```

```
cols <- c(1, 2, 6, 4, 7)
```

```
q1 <- 0.2
```

```
#deltas <- c(1.4, 1.3, 1.2, 1)
```

```

deltas <- seq(1, 1.4, length.out=5)

pw <- matrix(NA, ncol=length(p), nrow=length(deltas), dimnames=list(deltas, f.name))

model <- 'dominant'

delta <- 1

stats.null <- simuXY(nsim=nsim, n=n, m=m, p=p,delta=delta, mu=c(1*delta^2, 1*delta, 1), q1=q1, SD=1,
pval=pval, norm=norm, seed=set.seed(2811), model=model, random_sampling=FALSE)

cutoff <- matrix(NA, ncol=1, nrow=length(p), dimnames=list(f.name, paste(delta)))

for(pr in p){
  j <- which(p%in%pr)
  for(i in 1:1){
    if(pval){
      if(cali)
        cutoff[j, i] <- quantile(stats.null[['pval']][,j], probs=0.05) else
        cutoff[j, i] <- 0.05
    } else {
      if(cali)
        cutoff[j, i] <- quantile(stats.null[['pval']][,j], probs=0.95) else
        cutoff[j, i] <- 0.05
    }
  }
}

stats <- NULL

```

```

for(delta in deltas){

stats[[paste(delta)]] <- simuXY(nsim=nsim, n=n, m=m, p=p,delta=delta, mu=c(1*delta^2, 1*delta, 1),
q1=q1, SD=1, pval=pval, norm=norm, seed=set.seed(2811), model=model, random_sampling=FALSE)

for(pr in p){

  j <- which(p%in%pr)

  if(pval)

    #pw[paste(delta),j] <- sum(stats[[paste(delta)]][['pval']][,j] <= 0.05)/nsim else

    pw[paste(delta),j] <- sum(stats[[paste(delta)]][['pval']][,j] <= cutoff[j, 1])/nsim else

    pw[paste(delta),j] <- sum(stats[[paste(delta)]][['pval']] >= cutoff[j,i])/nsim

}

}

#quantitative

delta <- 1

stats.null.q <- simuXY(nsim=nsim, n=n, m=m, delta=delta, mu=c(1*delta^2, 1*delta, 1), p=1, q1=q1,
SD=1, pval=pval, norm=norm, seed=set.seed(2811), model=model, random_sampling=FALSE)

stats.q <- NULL

for(delta in deltas){

  stats.q[[paste(delta)]] <- simuXY(nsim=nsim, n=n, m=m, delta=delta, p=1, mu=c(1*delta^2, 1*delta, 1),
q1=q1, SD=1, pval=pval, norm=norm, seed=set.seed(2811), model=model, random_sampling=FALSE)

}

cutoff.q <- quantile(stats.null.q[['pval']][,1], probs=0.05)

pw.q <- sapply(c(1:length(deltas)), function(j) sum(stats.q[[j]][['pval']][,1] <= cutoff.q)/nsim)

```

```

#plot figure 1: power vs p

plot(p, pw[1,], xlab="Fractions", ylim=c(0,1), ylab="power", type="l", lty=1, col=cols[1], lwd=2,
main=paste("sample size = ", n, "; norm = ", norm, "; nsim =", nsim, "; model =", model, sep=""),
cex.main=0.8)

lines(p, pw[2,], lty=2, col=cols[2], lwd=2)

lines(p, pw[3,], lty=3, col=cols[3], lwd=2)

lines(p, pw[4,], lty=4, col=cols[4], lwd=2)

legend("bottomright", sapply(deltas, function(x) paste(expression(delta), x)), lty=c(1:4), col=cols, lwd=2)

abline(h=0.05, col='gray')

```

```

#power vs deltas

```

```

#frac <- round(p,1)

```

```

frac <- round(c(p[1], p[3], p[5], p[8], p[10]),1)

```

```

plot(deltas[length(deltas):1], pw[nrow(pw):1,1], xlab=expression(delta), ylim=c(0,1), ylab="power",
type="l", lty=1, col=cols[1], lwd=2, main=paste("sample size = ", n, "; norm = ", norm, "; nsim =", nsim, ";
model =", model, "; MAF =", q1, sep=""), cex.main=0.8)

```

```

lines(deltas[length(deltas):1], pw[nrow(pw):1,3], lty=2, col=cols[2], lwd=2)

```

```

lines(deltas[length(deltas):1], pw[nrow(pw):1,5], lty=3, col=cols[3], lwd=2)

```

```

lines(deltas[length(deltas):1], pw[nrow(pw):1,8], lty=4, col=cols[4], lwd=2)

```

```

lines(deltas[length(deltas):1], pw[nrow(pw):1,10], lty=5, col=cols[5], lwd=2)

```

```

legend("bottomright", sapply(frac, function(x) paste("fractions", x)), lty=c(1:5), col=cols, lwd=2)

```

```

points(deltas, pw.q, pch=4, lwd=2)

```

```

#aa. a is the minor allele

```

```

wd <- getwd()

```

```

source('batch_extreQTL_simu.r')

```

```

nsim <- 10000

```



```

m <- 1

pval <- TRUE

norm <- TRUE

cali <- TRUE

n <- 500

p <- seq(0.1, 0.5, length.out=5)

nf <- length(p)

f.name <- sapply(c(1:nf), function(x){paste("f", round(x, 2), sep="" )})

cols <- c(1, 2, 6, 4, 7)

q1 <- 0.2

deltas <- seq(1, 1.7, length.out=5)

#deltas <- c(1.7, 1.5, 1.3, 1)

pw <- matrix(NA, ncol=length(p), nrow=length(deltas), dimnames=list(deltas, f.name))

model <- 'recessive'

delta <- 1

stats.null <- simuXY(nsim=nsim, n=n, m=m, delta=delta, mu=c(1*delta^2, 1*delta, 1), p=p, q1=q1, SD=1,
pval=pval, norm=norm, seed=set.seed(2811), model=model, random_sampling=FALSE)

cutoff <- matrix(NA, ncol=1, nrow=length(p), dimnames=list(f.name, paste(delta)))

for(pr in p){
  j <- which(p%in%pr)
  for(i in 1:1){
    if(pval){

```

```

    if(cali)
      cutoff[j, i] <- quantile(stats.null[['pval']][,j], probs=0.05) else
      cutoff[j, i] <- 0.05
  } else {
    if(cali)
      cutoff[j, i] <- quantile(stats.null[['pval']][,j], probs=0.95) else
      cutoff[j, i] <- 0.05
  }
}
}

stats <- NULL

for(delta in deltas){

stats[[paste(delta)]] <- simuXY(nsim=nsim, p=p,n=n, m=m, delta=delta, mu=c(1*delta^2, 1*delta, 1),
q1=q1, SD=1, pval=pval, norm=norm, seed=set.seed(2811), model=model, random_sampling=FALSE)

for(pr in p){
  j <- which(p%in%pr)
  if(pval)
    #pw[paste(delta),j] <- sum(stats[[paste(delta)]][['pval']][,j] <= 0.05)/nsim else
    pw[paste(delta),j] <- sum(stats[[paste(delta)]][['pval']][,j] <= cutoff[j, 1])/nsim else
    pw[paste(delta),j] <- sum(stats[[paste(delta)]][['pval']] >= cutoff[j,i])/nsim
}
}
}

```

```

#quantitative

delta <- 1

stats.null.q <- simuXY(nsim=nsim, n=n, m=m, delta=delta, mu=c(1*delta^2, 1*delta, 1), p=1, q1=q1,
SD=1, pval=pval, norm=norm, seed=set.seed(2811), model=model, random_sampling=FALSE)

stats.q <- NULL

for(delta in deltas){

  stats.q[[paste(delta)]] <- simuXY(nsim=nsim, n=n, m=m, delta=delta, p=1, mu=c(1*delta^2, 1*delta, 1),
q1=q1, SD=1, pval=pval, norm=norm, seed=set.seed(2811), model=model, random_sampling=FALSE)

}

cutoff.q <- quantile(stats.null.q[['pval']],1, probs=0.05)

pw.q <- sapply(c(1:length(deltas)), function(j) sum(stats.q[[j]][['pval']],1) <= cutoff.q)/nsim)

#plot figure 1: power vs p

plot(p, pw[1,], xlab="Fractions", ylim=c(0,1), ylab="power", type="l", lty=1, col=cols[1], lwd=2,
main=paste("sample size = ", n, "; norm = ", norm, "; nsim = ", nsim, "; model = ", model, sep=""),
cex.main=0.8)

lines(p, pw[2,], lty=2, col=cols[2], lwd=2)

lines(p, pw[3,], lty=3, col=cols[3], lwd=2)

lines(p, pw[4,], lty=4, col=cols[4], lwd=2)

legend("bottomright", sapply(deltas, function(x) paste(expression(delta), x)), lty=c(1:4), col=cols, lwd=2)

abline(h=0.05, col='gray')

#power vs deltas

frac <- round(p,1)

#frac <- round(c(p[1], p[3], p[5], p[8], p[10]),1)

plot(deltas[length(deltas):1], pw[nrow(pw):1,1], xlab=expression(delta), ylim=c(0,1), ylab="power",
type="l", lty=1, col=cols[1], lwd=2, main=paste("sample size = ", n, "; norm = ", norm, "; nsim = ", nsim, ";
model = ", model, "; MAF = ", q1, sep=""), cex.main=0.8)

```

```
lines(deltas[length(deltas):1], pw[nrow(pw):1,2], lty=2, col=cols[2], lwd=2)
lines(deltas[length(deltas):1], pw[nrow(pw):1,3], lty=3, col=cols[3], lwd=2)
lines(deltas[length(deltas):1], pw[nrow(pw):1,4], lty=4, col=cols[4], lwd=2)
lines(deltas[length(deltas):1], pw[nrow(pw):1,5], lty=5, col=cols[5], lwd=2)
legend("bottomright", sapply(frac, function(x) paste("fractions", x)), lty=c(1:5), col=cols, lwd=2)
points(deltas, pw.q, pch=4, lwd=2)
```
